# Supplementary material for: Extreme modulation of liquid crystal viscoelasticityviaaltering the ester bond direction
Source: Royal Society of Chemistry journal article supplement (doi:10.1039/d1tc01636a), 2021-01-01
Supplement: d1tc01636a1.pdf [file d1tc01636a1.pdf]

# Extreme-Modulation of Liquid Crystal Viscoelasticity

## via Altering Ester Bond Direction

Wentao Tang,<sup>a</sup> Minghui Deng,<sup>a</sup> Junichi Kougo<sup>a,b</sup>, Li Ding,<sup>c</sup> Xiuhu Zhao,<sup>a</sup> Yuki Arakawa,<sup>\*d</sup>

Kenta Komatsu,<sup>d</sup> Hideto Tsuji<sup>d</sup> and Satoshi Aya<sup>\*a,b</sup>

<sup>a</sup> South China Advanced Institute for Soft Matter Science and Technology (AISMST), School of Molecular Science and Engineering, South China University of Technology, Guangzhou 510640, China

<sup>b</sup> Guangdong Provincial Key Laboratory of Functional and Intelligent Hybrid Materials and Devices, South China University of Technology, Guangzhou 510640, China

<sup>c</sup> School of Materials Science and Engineering (International School of Advanced Materials), South China University of Technology, Guangzhou 510641, China

<sup>d</sup> Department of Applied Chemistry and Life Science, Graduate School of Engineering, Toyohashi University of Technology, Toyohashi, 441-8580 Japan

\* Corresponding Author. E-mail: [satoshiaya@scut.edu.cn](mailto:satoshiaya@scut.edu.cn), E-mail: [arakawa@tut.jp](mailto:arakawa@tut.jp)

## Contents

1. Dielectric spectroscopy
2. Switching time tuning by mixing
3. Switching time for COO<sub>n</sub> and OCO<sub>n</sub> homologs (*n* = 8 and 10)
4. Supporting figures

### 1. Dielectric spectroscopy

The dielectric spectroscopy was made by using a multichannel electrochemical workstation (VMP3 Potentiostat, BioLogic). As shown in Fig. S9, a large dielectric relaxation was observed for COO<sub>4</sub> and OCO<sub>4</sub> molecules (also for all the other homologues) with the relaxation strength,  $\delta\epsilon$ , of over 100. Similar relaxation process, but with small  $\delta\epsilon$ , was observed previously, and assigned to a goldstone mode that corresponds to the long-scale fluctuations of the azimuthal angle of the local nematic director along the coarse-grained the coarse grained director.<sup>S1-S3</sup> The correlation length of the precession fluctuation can be estimated by using a non-stationary solution of the Smoluchowski equation.<sup>S1</sup> The correlation length is written as  $\delta z^2 \approx D/q^2\omega$ . *D*, *q* and  $\omega$  are the orientational diffusion coefficient, wavenumber of the heliconical structure and the frequency. We used  $D=10^9$  s<sup>-1</sup>, *q* from Ref. S4 and  $\omega$  from the measured dielectric spectrum (e.g. Fig. S9) for calculating the correlation length  $\delta z$ . Fig. S10 demonstrates COO<sub>4</sub> exhibits considerably longer correlations than others. With increasing the number of the carbon spacer in COO<sub>n</sub>, the correlation length decreases to nearly similar to that of OCO<sub>n</sub>.

### 2. Switching time tuning by mixing

To seek the possibility for tuning the viscoelastic properties in a wide range of values, we studied the LCD electro-optical characteristics by mixing COO<sub>4</sub> and OCO<sub>4</sub> molecules. We confirmed the solubility of COO<sub>4</sub> in OCO<sub>4</sub> very nice independent on the weight ratio. The phase diagram is shown in Fig. 3(a). Strikingly, the increasing of the weight of COO<sub>4</sub> in OCO<sub>4</sub> allows us for extremely modulate the switching time, continuously going from c.a. 0.1 s (pure OCO<sub>4</sub>) up to several hundreds of seconds (pure COO<sub>4</sub>). Fig. S11 represents the temperature dependence of off-switching time in various mixtures with different mixing ratio of COO<sub>4</sub> by weight.

### 3. Switching time for $\text{COO}_n$ and $\text{OCO}_n$ homologs ( $n = 8$ and $10$ )

As discussed in the manuscript, decreasing the carbon number in the spacer causes the slow-down of their dynamics, suggesting the stronger molecular packing at longer flexible spacers. Here we show the temperature dependence of off-switching time in  $\text{COO}_n$  and  $\text{OCO}_n$  ( $n = 8$  and  $10$ ) in Fig. S12. As shown in the figure, a decrease in the off-switching time was observed in  $\text{COO}$  homologs with increasing carbon number of spaces. Their off-switching time is in the order of hundred seconds, which is still one order longer than that in  $\text{OCO}_n$ . Based on the Arrhenius plots, the rotation activation energy for  $\text{COO}_{10}$  (0.52eV) is about two times of that in  $\text{OCO}_{10}$ . (0.34eV) while the rotation activation energy for  $\text{COO}_6$  (1.61eV) is around four times magnitude for  $\text{OCO}_6$  (0.42eV). It is revealed that the activation energy of  $\text{COO}_n$  ( $n = 8$  and  $10$ ) is comparable with thoes in  $\text{OCO}_n$  ( $n = 4$  and  $6$ ). Thereby, reducing the carbon number in the spacer results in the decrease of the activation energy in the  $\text{COO}_n$ . This result is well consistent with the dielectric measurements.

### 4. Supporting figures

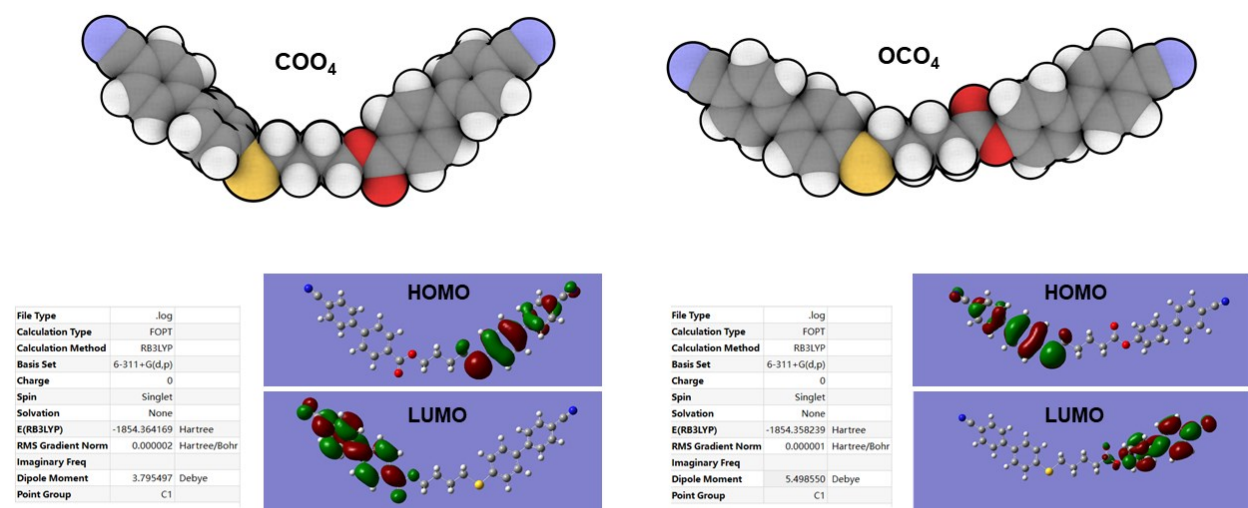

**Fig. S1.** Summary of DFT calculation at B3LYP-G3/6-311+G(d,p) basis for  $\text{COO}_4$  and  $\text{OCO}_4$  molecules.

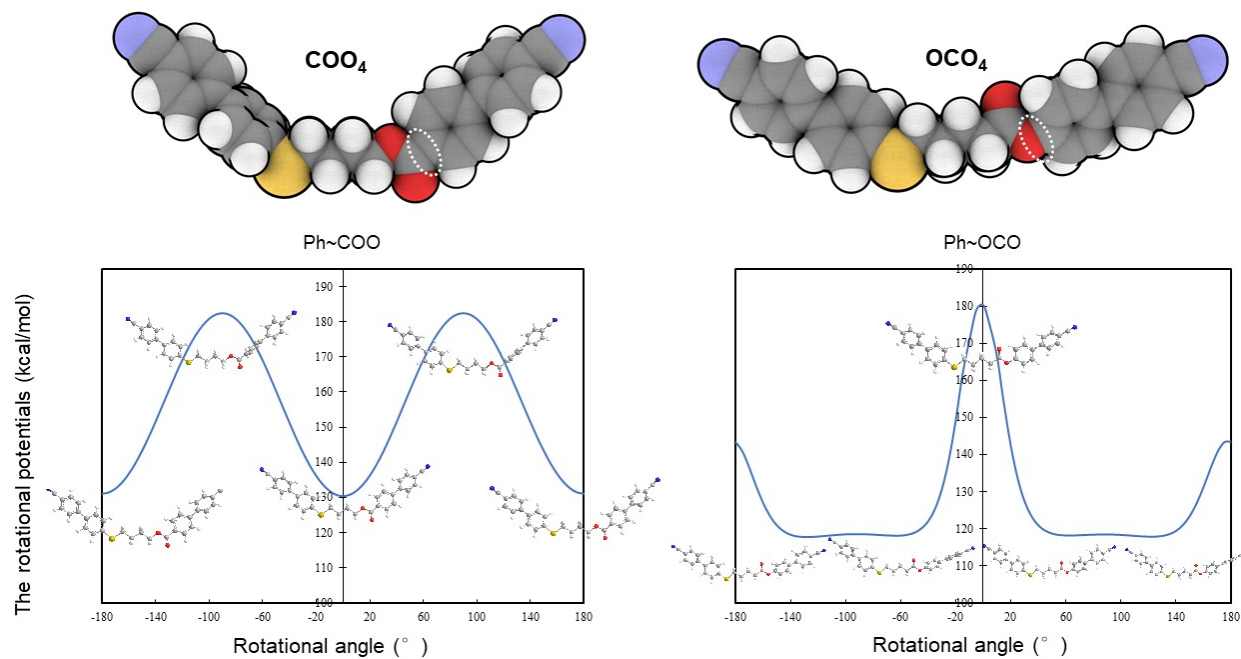

**Fig. S2.** The rotational potentials about Ph–C or Ph–O bonds (represented by dotted circles in the upper space filling representations for COO<sub>4</sub> and OCO<sub>4</sub>, respectively) as a function of the rotation angle.

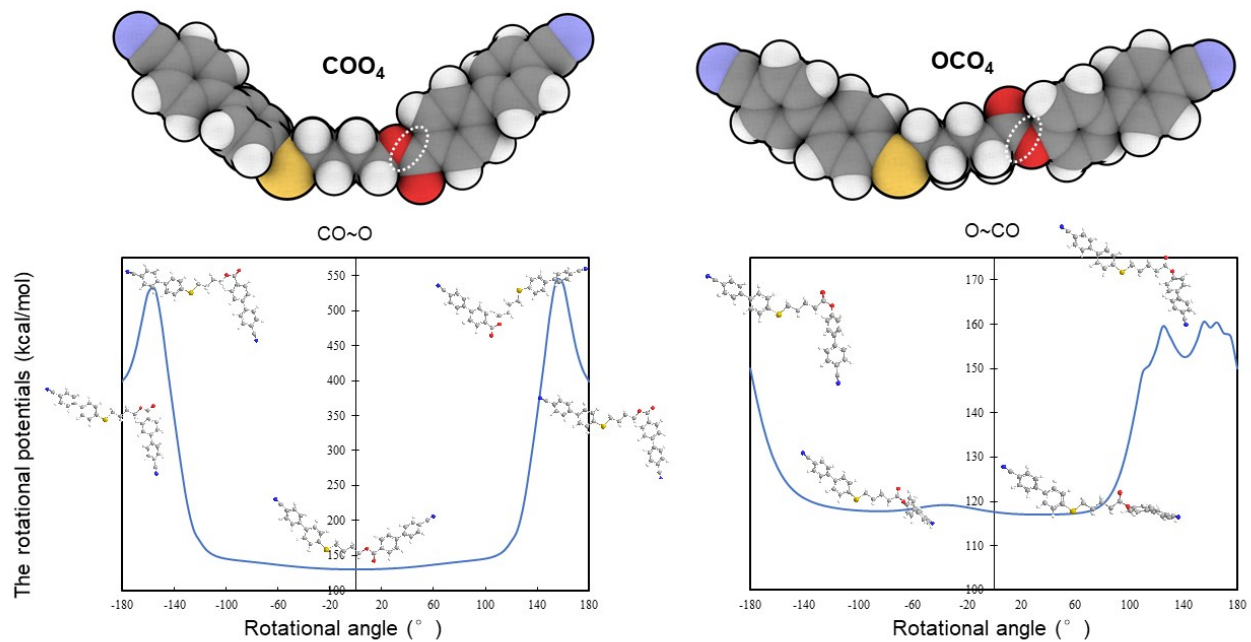

**Fig. S3.** The rotational potentials about C–O or O–C bonds (represented by dotted circles in the upper space filling representations for  $\text{COO}_4$  and  $\text{OCO}_4$ , respectively) as a function of the rotation angle.

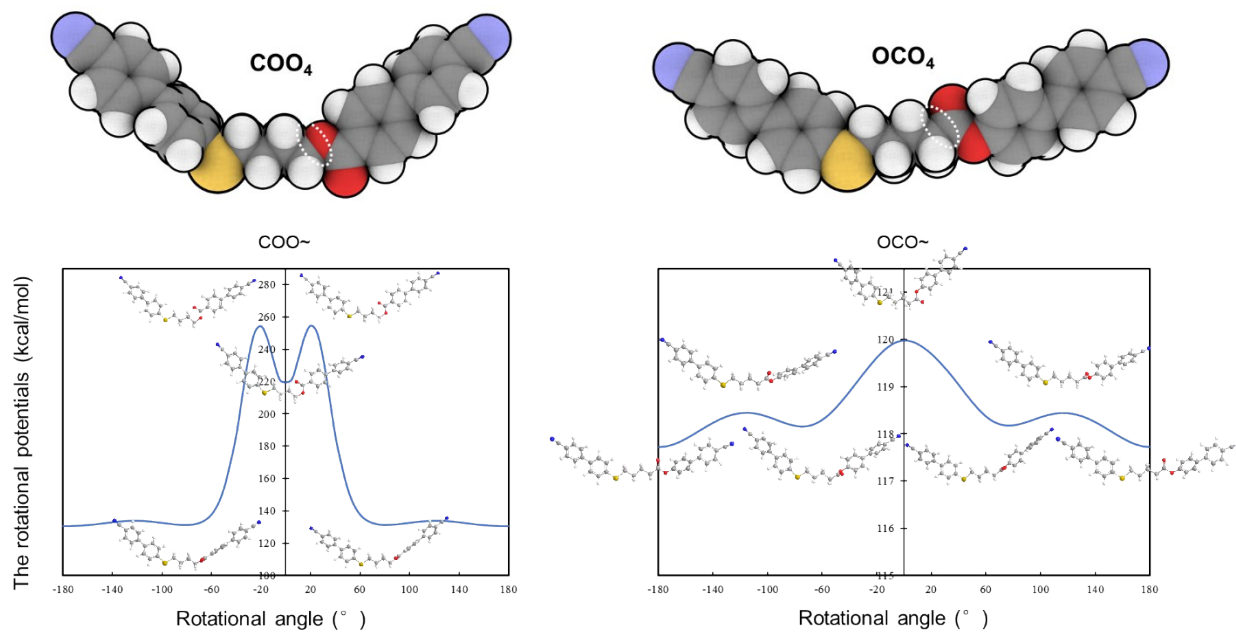

**Fig. S4.** The rotational potentials about O–C or C–C bonds (represented by dotted circles in the upper space filling representations for  $\text{COO}_4$  and  $\text{OCO}_4$ , respectively) as a function of the rotation angle.

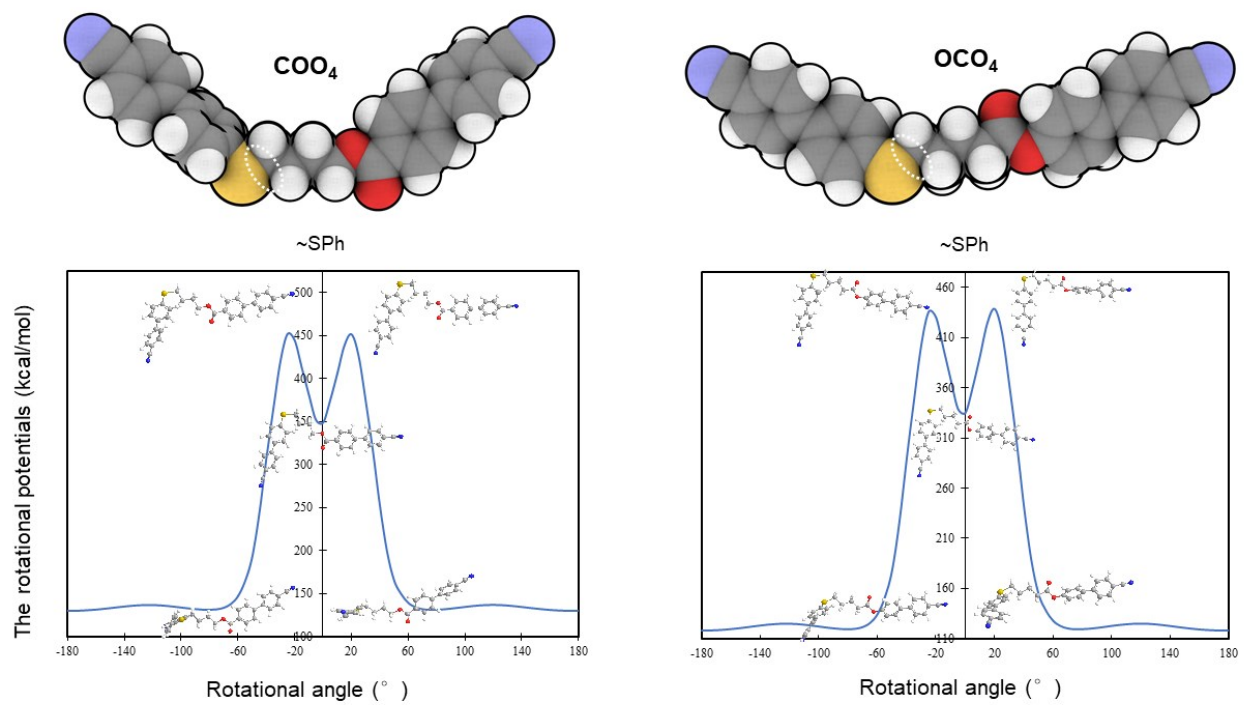

**Fig. S5.** The rotational potentials about  $-\text{SC}$  bonds (represented by dotted circles in the upper space filling representations for  $\text{COO}_4$  and  $\text{OCO}_4$ ) as a function of the rotation angle.

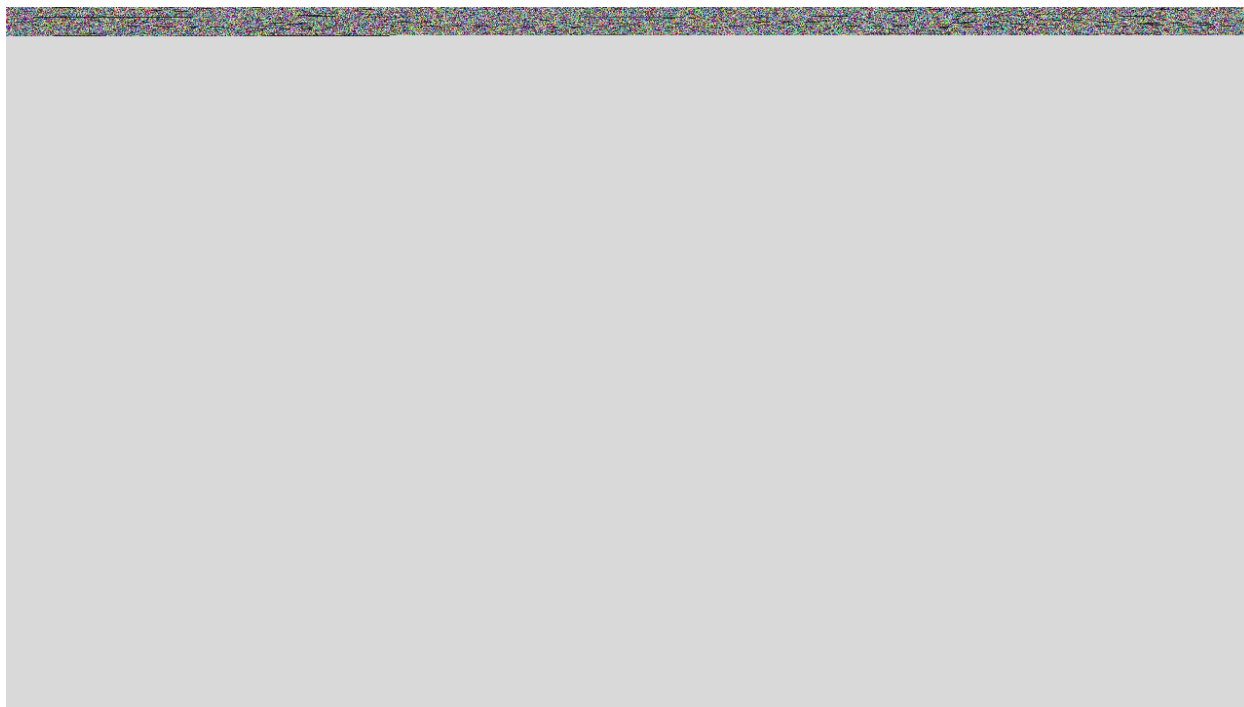

**Fig. S6.** The rotational potentials about S–C bonds (represented by dotted circles in the upper space filling representations for  $\text{COO}_4$  and  $\text{OCO}_4$ ) as a function of the rotation angle.

**Fig. S7.** (a-f) Stripe textures of  $\text{COO}_4$  and  $\text{OCO}_4$  molecules are presented at the different thicknesses of the samples. (g) The temperature dependence of the stripe periodicity is shown as a function of temperature.



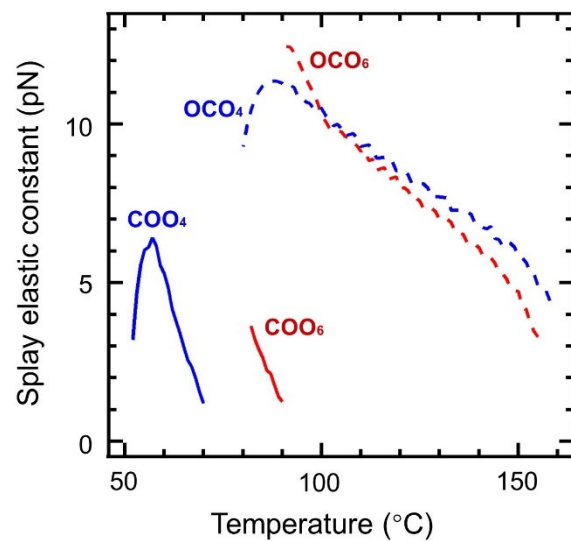

**Fig. S8.** Temperature dependencies of the splay elastic constant of the N phase in the four molecules,  $\text{COO}_4$ ,  $\text{OCO}_4$ ,  $\text{COO}_6$  and  $\text{OCO}_6$ .

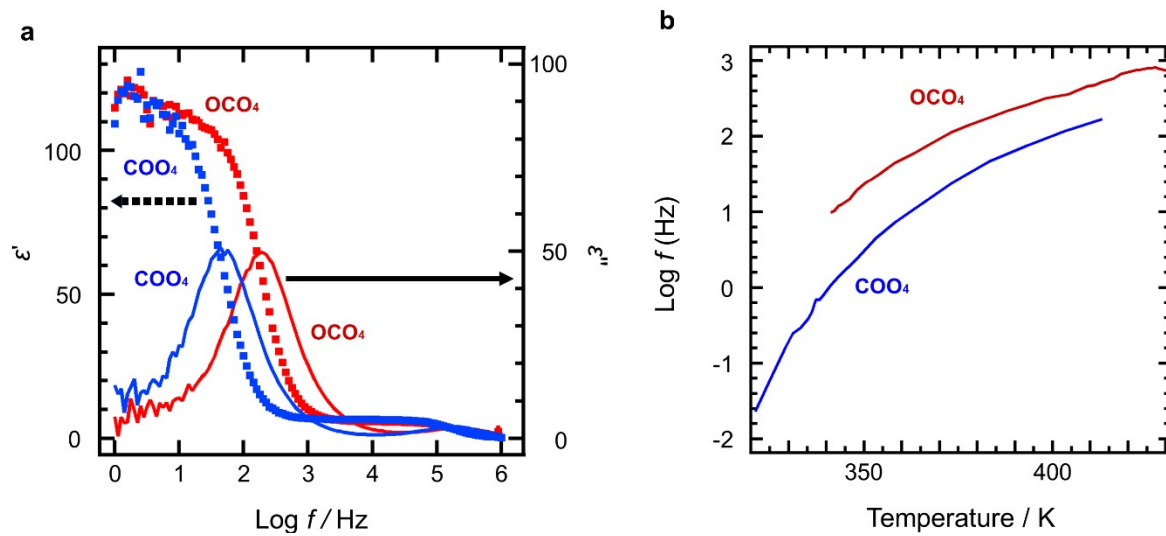

**Fig. S9.** Dielectric spectroscopy of  $\text{COO}_4$  and  $\text{OCO}_4$ : (a) The real and imaginary dielectric permittivity. The full squares show the real dielectric permittivity data. The solid lines show the imaginary dielectric permittivity data.; (b) The temperature dependence of the relaxation frequency of the slowest relaxation mode,  $m_4$ .

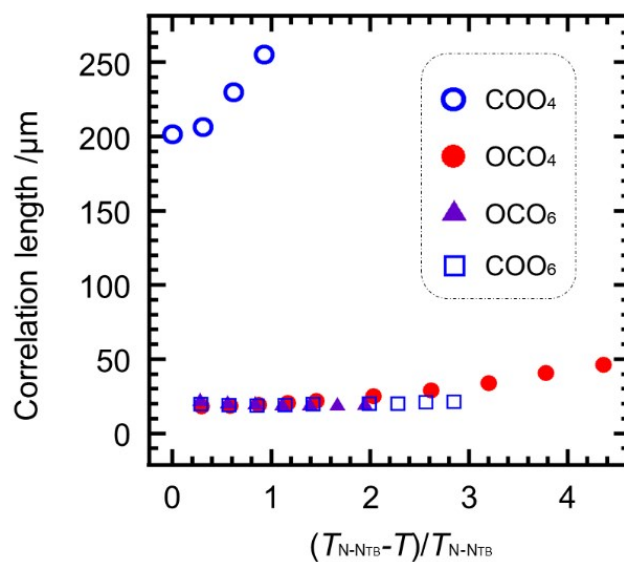

**Fig. S10.** The correlation lengths of the fluctuation of the azimuthal angle of the local director for  $\text{COO}_4$ ,  $\text{OCO}_4$ ,  $\text{COO}_6$  and  $\text{OCO}_6$  as a function of a scaled temperature.

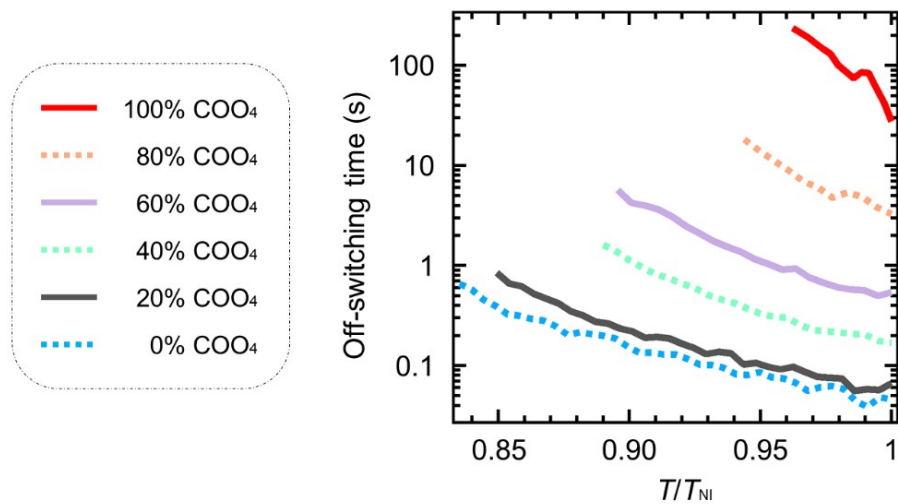

**Fig. S11.** The temperature dependencies of the off-switching time for COO<sub>4</sub>-OCO<sub>4</sub> mixtures at different weight ratios of COO<sub>4</sub>.

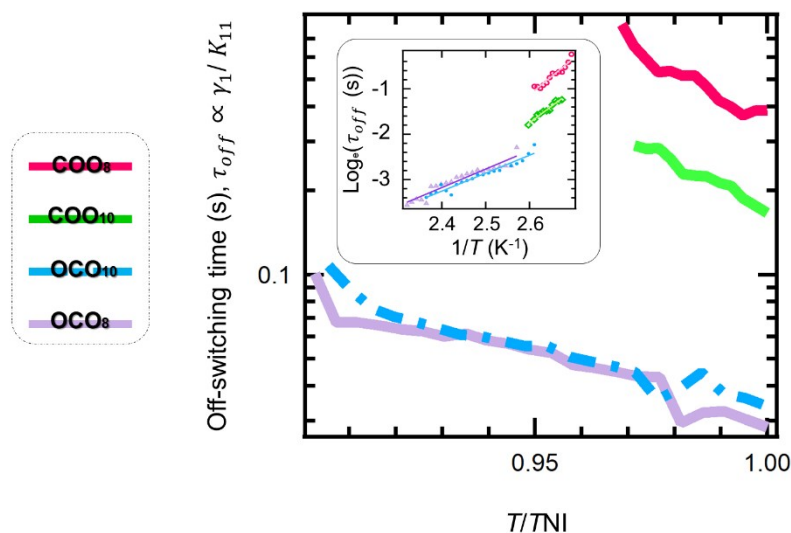

**Fig. S12.** The temperature dependencies of the off-switching time for  $COO_n$  and  $OCO_n$  ( $n = 8$  and  $10$ ). The inset demonstrates the corresponding Arrhenius plot.  $T_{NI}$  is the transition temperature between the N and the isotropic liquid state.

## References

- S1. K. Merkel, A. Kocot, C. Welch and G. H. Mehl, Soft Modes of the Dielectric Response in the Twist-Bend Nematic Phase and Identification of the Transition to a Nematic Splay Bend Phase in the CBC7CB Dimer, *Phys. Chem. Chem. Phys.*, 2019, **21**(41), 22839–22848.
- S2. K. Merkel, A. Kocot, J. K., Vij, G. Shanker, Distortions in Structures of the Twist Bend Nematic Phase of a Bent-Core Liquid Crystal by the Electric Field, *Phys. Rev. E*, 2018, **98**(2), 1–8.
- S3. K. Merkel, C. Welch, Z. Ahmed, W. Piecek and G. H. Mehl, Dielectric Response of Electric-Field Distortions of the Twist-Bend Nematic Phase for LC Dimers, *J. Chem. Phys.*, 2019, **151**(11), 114908.
- S4. Y. Arakawa, K. Komatsu, J. Feng, C. Zhu and H. Tsuji, Distinct Twist-Bend Nematic Phase Behaviors Associated with the Ester-Linkage Direction of Thioether-Linked Liquid Crystal Dimers, *Mater. Adv.*, 2021, **2**(1), 261–272.
